# Supplementary material for: Characterization of Antibiotic Resistance in Select Tertiary Hospitals in Uganda: An Evaluation of 2020 to 2023 Routine Surveillance Data
Source: MDPI journal article supplement (doi:10.3390/tropicalmed9040077), 2024-04-05
Supplement: s1 [file s1]

# Supplementary Materials: Characterization of Antibiotic Resistance in Select Tertiary Hospitals in Uganda: An Evaluation of 2020 to 2023 Routine Surveillance Data

Table S1. Isolate recovery from the different specimen

| Isolates Recovered by Specimen |       |       |       |            |     |          |
|--------------------------------|-------|-------|-------|------------|-----|----------|
| Isolates                       | Blood | Urine | Stool | Urogenital | CSF | Pus Swab |
| <i>Acinetobacter</i> spp.      | 5     | 8     |       |            |     | 57       |
| <i>Shigella</i> spp.           |       |       | 7     |            |     |          |
| <i>Salmonella</i> spp.         | 7     |       |       |            |     |          |
| <i>E. coli</i>                 | 37    | 443   |       |            | 3   | 325      |
| <i>Klebsiella</i> spp.         | 44    | 115   |       |            |     | 200      |
| <i>Citrobacter</i> spp.        |       | 52    |       |            |     | 120      |
| <i>Proteus</i> spp.            |       | 1     |       |            |     | 14       |
| <i>Pseudomonas</i> spp.        | 3     | 20    |       |            |     | 69       |
| <i>Enterobacter</i> spp.       | 10    | 29    |       |            |     | 38       |
| <i>S. pneumoniae</i> .         | 1     |       |       |            | 4   |          |
| <i>Staphylococcus aureus</i> . | 121   | 299   |       |            |     | 600      |
| <i>Enterococcus</i> spp.       | 17    | 64    |       |            |     | 20       |
| <i>Neisseria gonorrhea</i>     |       | 4     |       | 17         |     |          |
| Total                          | 245   | 1,035 | 7     | 17         | 7   | 1,443    |

Table S2. General antibiotic resistance in specialized clinics

| Antibiotic                    | Gram-Negative Isolates |                              |              |                                 |                               | Gram-Positive Isolates             |                                |
|-------------------------------|------------------------|------------------------------|--------------|---------------------------------|-------------------------------|------------------------------------|--------------------------------|
|                               | Enterobacterales       |                              |              | Non Enterobacterales            |                               | <i>Staphylococcus aureus</i> n(%S) | <i>Enterococcus</i> spp. n(%S) |
|                               | <i>E. coli</i> n(%S)   | <i>Klebsiella</i> spp. n(%S) | Others n(%S) | <i>Acinetobacter</i> spp. n(%S) | <i>Pseudomonas</i> spp. n(%S) |                                    |                                |
| Ampicillin                    | 113 (4%)               |                              |              |                                 |                               | 26 (0%)                            | 30 (43%)                       |
| Amoxicillin/Clavulanic acid   | 122 (20%)              |                              |              |                                 |                               |                                    |                                |
| Ciprofloxacin                 | 126 (22%)              | 123 (31%)                    | 66 (39%)     | 106 (29%)                       | 82 (73%)                      | 94 (36%)                           | 9 (0%)                         |
| Chloramphenicol               | 105 (70%)              | 106 (51%)                    | 50 (31%)     |                                 |                               | 72 (51%)                           | 41 (34%)                       |
| Ceftriaxone                   | 134 (14%)              | 131 (15%)                    | 53 (40%)     | 39 (3%)                         |                               |                                    |                                |
| Meropenem                     | 17 (100%)              | 23 (70%)                     | 16 (93%)     | 31 (19%)                        | 18 (39%)                      |                                    |                                |
| Imipenem                      | 130 (90%)              | 129 (82%)                    | 51 (48%)     | 102 (4%)                        | 76 (59%)                      |                                    |                                |
| Trimethoprim/Sulfamethoxazole | 13 (0%)                | 16 (25%)                     | 5 (17%)      | 4 (25%)                         |                               | 28 (4%)                            |                                |

|              |              |           |          |           |          |          |
|--------------|--------------|-----------|----------|-----------|----------|----------|
| Gentamicin   | 135<br>(44%) | 121 (41%) | 62 (48%) | 103 (24%) | 78 (56%) | 66 (76%) |
| Erythromycin |              |           |          |           |          | 66 (33%) |
| Vancomycin   |              |           |          |           |          | 49 (14%) |

**Table S3.** AMR variation by gender.

| Antibiotics                       | Gender | Susceptibility | OR[95% CI]        | <i>p</i> -Values |
|-----------------------------------|--------|----------------|-------------------|------------------|
| Ampicillin                        | Male   | 989 (15%)      | 1.23[0.921–1.637] | 0.161            |
|                                   | Female | 661 (13%)      | Ref               |                  |
| Amoxicillin/ Clavulanic acid      | Male   | 723 (49%)      | 0.97[0.77–1.23]   | 0.82             |
|                                   | Female | 456 (50%)      | Ref               |                  |
| Ciprofloxacin                     | Male   | 1599 (48%)     | 0.95[0.816–1.099] | 0.475            |
|                                   | Female | 1216 (49%)     | Ref               |                  |
| Chloramphenicol                   | Male   | 1073 (60%)     | 0.9[0.747–1.093]  | 0.295            |
|                                   | Female | 776 (63%)      | Ref               |                  |
| Ceftriaxone                       | Male   | 593 (37%)      | 1.09[0.838–1.411] | 0.528            |
|                                   | Female | 424 (35%)      | Ref               |                  |
| Meropenem                         | Male   | 259 (79%)      | 0.72[0.447–1.16]  | 0.177            |
|                                   | Female | 203 (84%)      | Ref               |                  |
| Imipenem                          | Male   | 1066 (86%)     | 1.1[0.839–1.435]  | 0.498            |
|                                   | Female | 735 (85%)      | Ref               |                  |
| Trimethoprim/<br>Sulfamethoxazole | Male   | 1133 (22%)     | 0.84[0.678–1.034] | 0.100            |
|                                   | Female | 806 (26%)      | Ref               |                  |
| Gentamicin                        | Male   | 1340 (58%)     | 0.89[0.756–1.051] | 0.172            |
|                                   | Female | 1053 (61%)     | Ref               |                  |
| Erythromycin                      | Male   | 785 (30%)      | 0.75[0.595–0.941] | 0.013            |
|                                   | Female | 569 (36%)      | Ref               |                  |
| Vancomycin                        | Male   | 284 (40%)      | 1.01[0.687–1.487] | 0.957            |
|                                   | Female | 173 (40%)      | Ref               |                  |
| Oxacillin/ Methicillin            | Male   | 137 (47%)      | 1.22[0.74–2.019]  | 0.432            |
|                                   | Female | 113 (42%)      | Ref               |                  |
